# Supplementary material for: High-performance phosphide/carbon counter electrode for both iodide and organic redox couples in dye-sensitized solar cells
Source: Royal Society of Chemistry journal article supplement (doi:10.1039/c2jm30832k), 2012-01-01
Supplement: c2jm30832k.pdf [file c2jm30832k.pdf]

## Supplementary Information

### High-performance phosphide/carbon counter electrode for both iodide and organic redox couples in dye-sensitized solar cells

Mingxing Wu, Jin Bai, Yudi Wang, Anjie Wang, Xiao Lin, Liang Wang, Yihua Shen, Zeqing Wang,

Anders Hagfeldt and Tingli Ma\*

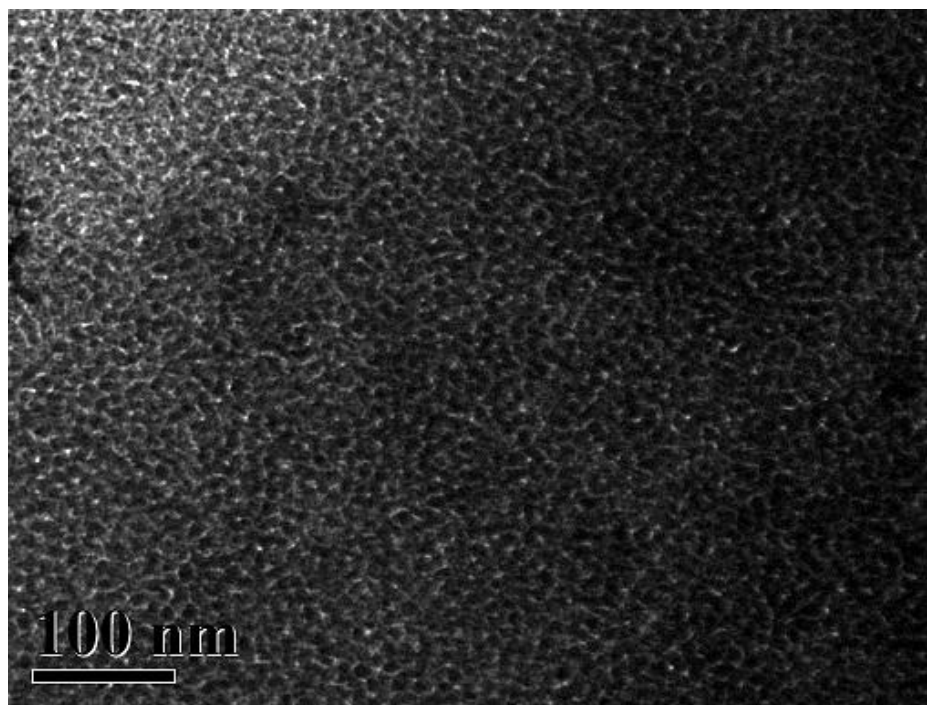

**Fig. S1** TEM image of mesoporous carbon (MC)

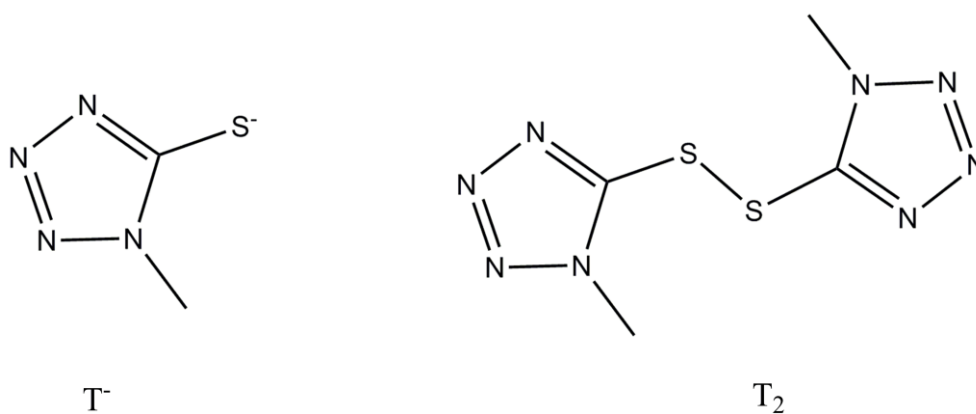

**Fig. S2** Chemical structure of the redox couple of disulfide/thiolate ( $T_2/T^-$ )

**Table S1.** Photovoltaic parameters of the  $T_2/T^-$  based DSCs using MC,  $Ni_5P_4$ ,  $Ni_5P_4/C$  and Pt counter electrodes and EIS parameters of the  $T_2/T^-$  based symmetrical cells using two identical MC,  $Ni_5P_4$ ,  $Ni_5P_4/C$ , and Pt electrodes

| CE          | $V_{oc}/V$ | $J_{sc}/mA\ cm^{-2}$ | FF   | PCE/% | $R_s/\Omega$ | $R_{ct}/\Omega$ | $Z_N/\Omega$ |
|-------------|------------|----------------------|------|-------|--------------|-----------------|--------------|
| Pt          | 0.62       | 11.12                | 0.49 | 3.38  | 8.04         | 42.5            | 35.8         |
| $Ni_5P_4/C$ | 0.63       | 11.81                | 0.64 | 4.75  | 23.4         | 13.5            | 56.6         |
| $Ni_5P_4$   | 0.63       | 11.40                | 0.54 | 3.87  | 20.5         | 40.3            | 95.4         |
| MC          | 0.63       | 12.88                | 0.54 | 4.40  | 18.9         | 18.7            | 130.5        |
